# Supplementary material for: Dinickel–Salphen Complexes as Binders of Human Telomeric Dimeric G‐Quadruplexes
Source: PubMed Central journal article supplement (PMC5516229; doi:10.1002/chem.201700276), 2017-03-24
Supplement: CHEM-23-4713-s001.pdf [file CHEM-23-4713-s001.pdf]

# CHEMISTRY

## A **European** Journal

### Supporting Information

#### **Dinickel–Salphen Complexes as Binders of Human Telomeric Dimeric G-Quadruplexes**

Chun-Qiong Zhou,<sup>[a, b]</sup> Ting-Cong Liao,<sup>[b]</sup> Zi-Qi Li,<sup>[b]</sup> Jorge Gonzalez-Garcia,<sup>[a]</sup>  
Matthew Reynolds,<sup>[a]</sup> Min Zou,<sup>[b]</sup> and Ramon Vilar<sup>\*[a]</sup>

chem\_201700276\_sm\_miscellaneous\_information.pdf

**Table S1.** Apparent affinity constants ( $K_a$ 's,  $M^{-1}$ ) of complexes **2a-c** and **1** for quadruplexes G2T1, G1 and CT DNA in 10 mM Tris-HCl, 100 mM KCl (pH 7.04) by UV-Vis spectroscopy.

| Complex   | $K_a$ (G2T1)                             | $K_a$ (G1)                               | $K_a$ (CT DNA)              | Selectivity for G2T1 vs. G1 | Selectivity for G2T1 vs. CT-DNA |
|-----------|------------------------------------------|------------------------------------------|-----------------------------|-----------------------------|---------------------------------|
| <b>2a</b> | <sup>a</sup> $1.19 \pm 0.16 \times 10^6$ | <sup>a</sup> $2.39 \pm 0.35 \times 10^6$ | $2.54 \pm 0.24 \times 10^5$ | 1                           | 5                               |
| <b>2b</b> | <sup>a</sup> $2.52 \pm 0.24 \times 10^6$ | <sup>a</sup> $3.53 \pm 0.33 \times 10^6$ | $2.05 \pm 0.08 \times 10^5$ | 1                           | 12                              |
| <b>2c</b> | <sup>b</sup> $1.37 \pm 0.25 \times 10^7$ | <sup>b</sup> $2.19 \pm 0.32 \times 10^6$ | $1.06 \pm 0.11 \times 10^5$ | 6                           | 129                             |
| <b>1</b>  | <sup>a</sup> $1.50 \pm 0.22 \times 10^7$ | <sup>b</sup> $1.15 \pm 0.18 \times 10^7$ | $1.20 \pm 0.15 \times 10^5$ | 1                           | 125                             |

<sup>a</sup> Absorption measured at 310 nm; <sup>b</sup> Absorption measured at 370 nm.

**Table S2.** Binding constants ( $K$ 's,  $M^{-1}$ ) and  $\Delta T_m$  ( $^{\circ}C$ ) of previously reported binders towards dimeric quadruplex G2T1 DNA.

| Binder                                     | $K$                            | $\Delta T_m$ | References |
|--------------------------------------------|--------------------------------|--------------|------------|
| Cyclic helicene M1                         | $2.31 \times 10^6$             | /            | [1]        |
| QATPE <sup>a</sup>                         | $8.94 \times 10^6$             | 6.6          | [2]        |
| TMPipEOPP (p- and m-) <sup>b</sup>         | $(1.05 \sim 2.53) \times 10^6$ | 5.1~13       | [3]        |
| RHPS4 <sup>c</sup> and DR4-47 <sup>d</sup> | /                              | 20.5~28.5    | [4]        |
| EPI <sup>e</sup>                           | $2.60 \times 10^7$             | /            | [5]        |
| Ni-M <sup>f</sup>                          | $4.6 \times 10^7$              | 14           | [6]        |
| Dimeric berberine                          | $(2.0 \sim 2.4) \times 10^7$   | -0.5         | [7]        |

<sup>a</sup>QATPE = 1, 1, 2, 2-Tetrakis[4-[(trimethylammonium)butoxy]phenyl]tetraphenylethene tetrabromide; <sup>b</sup> TMPipEOPP = cationic porphyrin derivative; <sup>c</sup> RHPS4 = fluoroquinolinoacridinium cation; <sup>d</sup> DR4-47 = Hybrid oxazole-triazole ligand; <sup>e</sup> EPI = epiberberine; <sup>f</sup> Ni-M = Zinc-finger like nanosized chiral Ni(II)-supramolecular complex.

- [1] K. Shinohara, Y. Sannohe, S. Kaieda, K. Tanaka, H. Osuga, H. Tahara, Y. Xu, T. Kawase, T. Bando, H. Sugiyama, *J. Am. Chem. Soc.* **2010**, *132*, 3778-3782.
- [2] Q. Zhang, Y. -C. Liu, D. -M. Kong, D. -S. Guo, *Chem. Eur. J.* **2015**, *21*, 13253-13260.
- [3] a) X. -X. Huang, L. -N. Zhu, B. Wu, Y. -F. Huo, N. -N. Duan, D. -M. Kong, *Nucleic Acids Res.* **2014**, *42*, 8719-8731; b) L. -N. Zhu, B. Wu, D. -M. Kong, *Nucleic Acids Res.* **2013**, *41*, 4324-4335.
- [4] A. R. O. Cousins, D. Ritson, P. Sharma, M. F. G. Stevens, J. E. Moses, M. S. Searle, *Chem. Commun.* **2014**, *50*, 15202-15205.
- [5] L. Zhang, H. Liu, Y. Shao, C. Lin, H. Jia, G. Chen, D. Yang, Y. Wang, *Anal. Chem.* **2015**, *87*, 730-737.
- [6] C. Q. Zhao, L. Wu, J. S. Ren, Y. Xu, X. G. Qu, *J. Am. Chem. Soc.* **2013**, *135*, 18786-18789.
- [7] C. -Q. Zhou, J. -W. Yang, C. Dong, Y. -M. Wang, B. Sun, J. -X. Chen, Y. -S. Xu, W. -H. Chen, *Org. Biomol. Chem.* **2016**, *14*, 191-197.

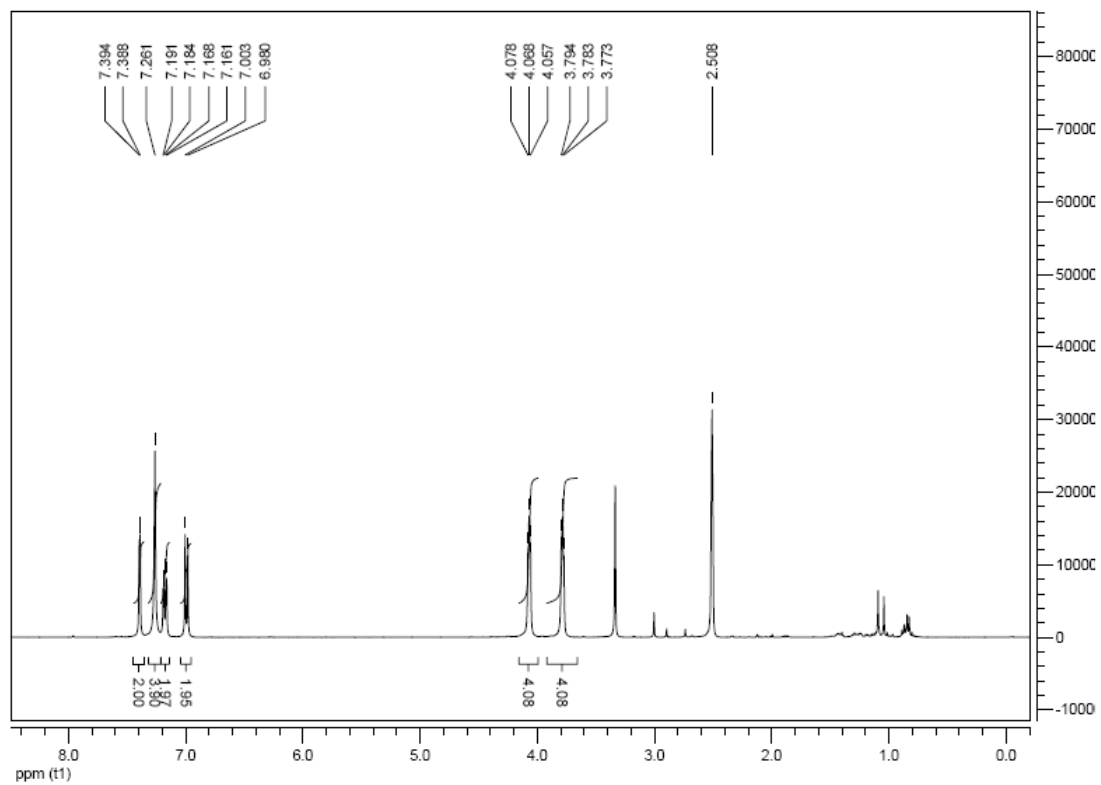

**Figure S1.**  $^1\text{H}$  NMR (400 MHz) of compound **5a** in  $d_6$ -DMSO.

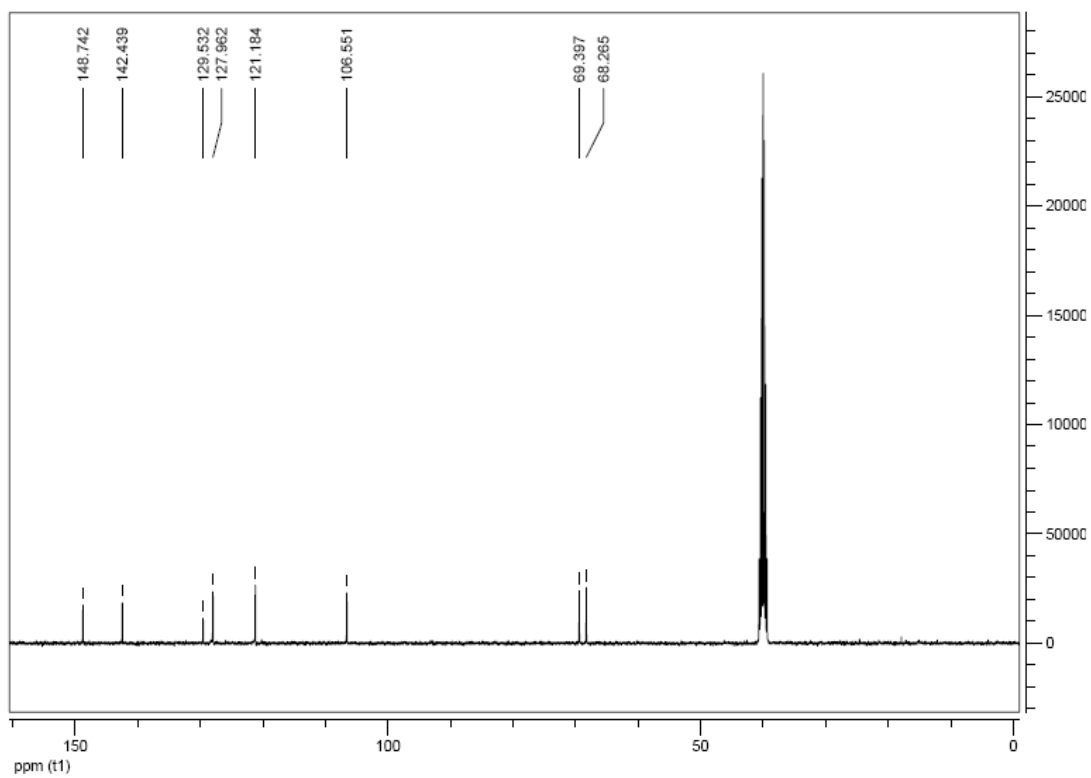

**Figure S2.**  $^{13}\text{C}$  NMR (75.4 MHz) of compound **5a** in  $d_6$ -DMSO.

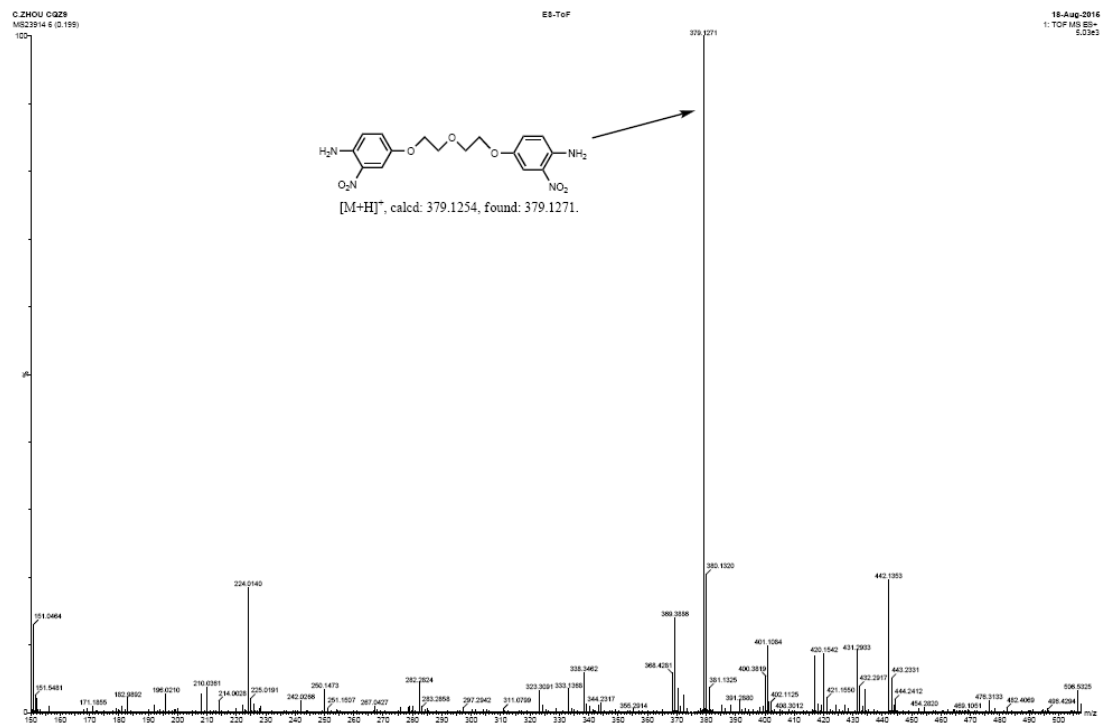

**Figure S3.** HR-ESI-MS of compound **5a**.

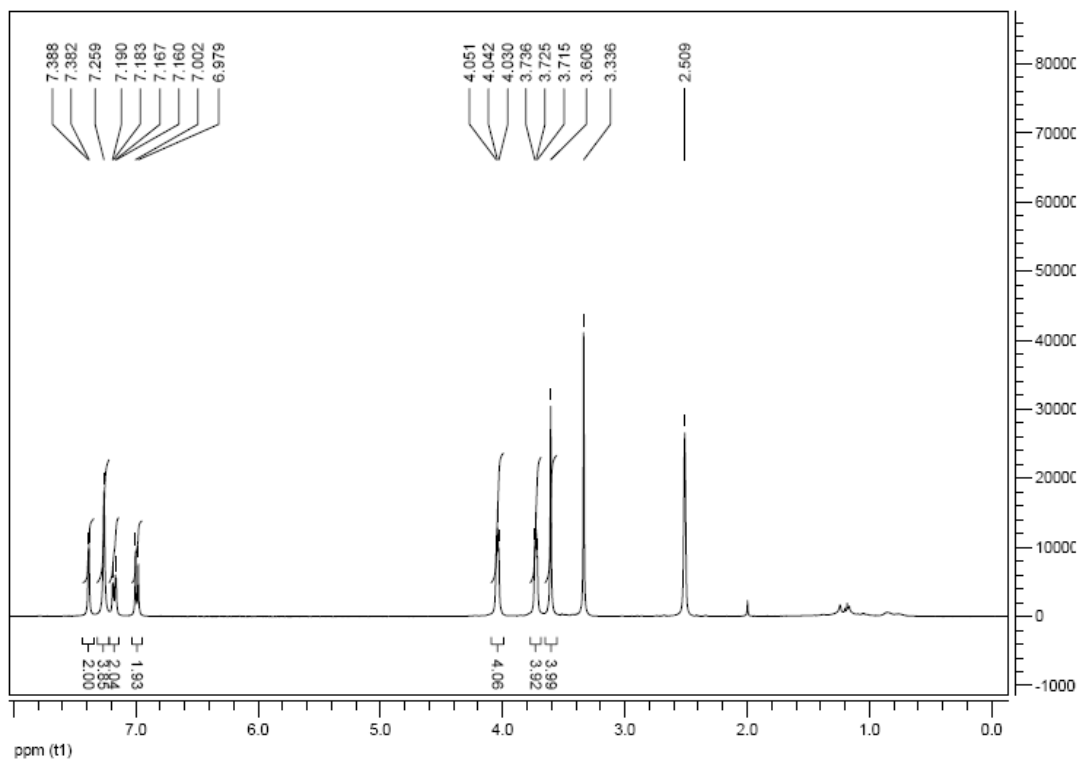

**Figure S4.** <sup>1</sup>H NMR (400 MHz) of compound **5b** in *d*<sub>6</sub>-DMSO.

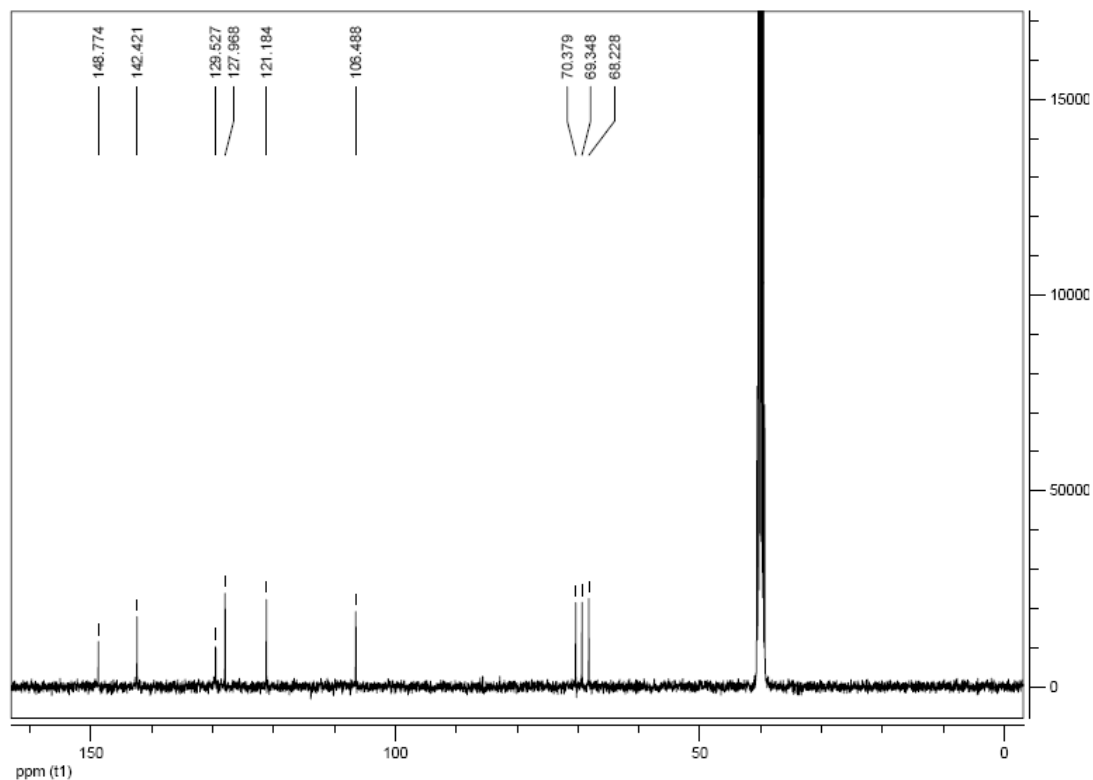

**Figure S5.**  $^{13}\text{C}$  NMR (75.4 MHz) of compound **5b** in  $d_6$ -DMSO.

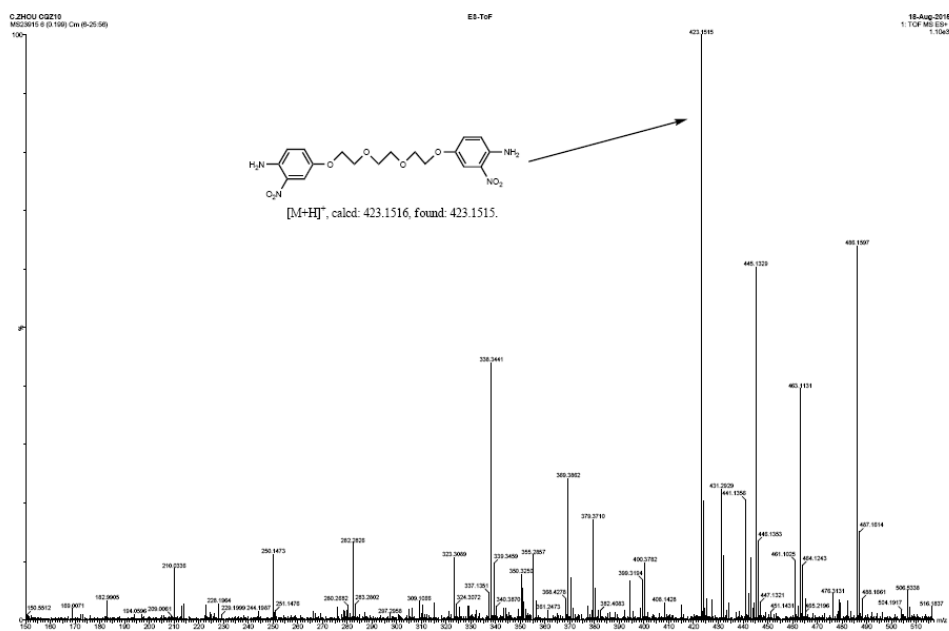

**Figure S6.** HR-ESI-MS of compound **5b**.

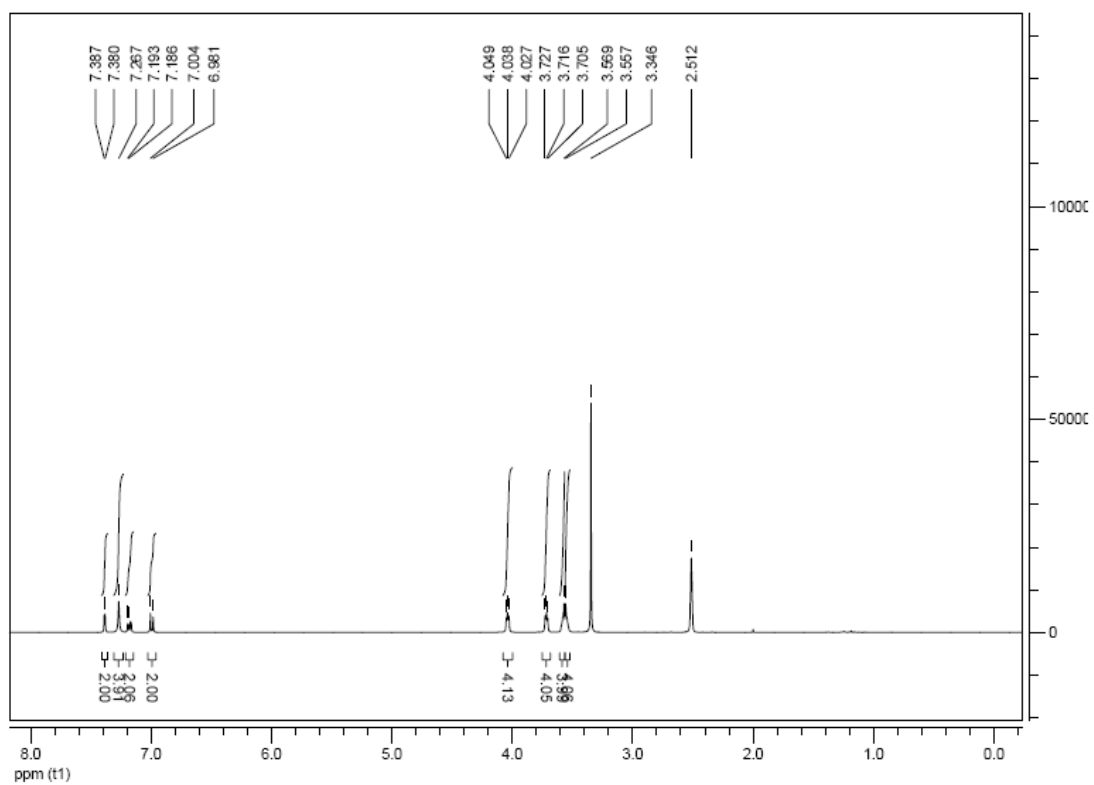

**Figure S7.**  $^1\text{H}$  NMR (400 MHz) of compound **5c** in  $d_6$ -DMSO.



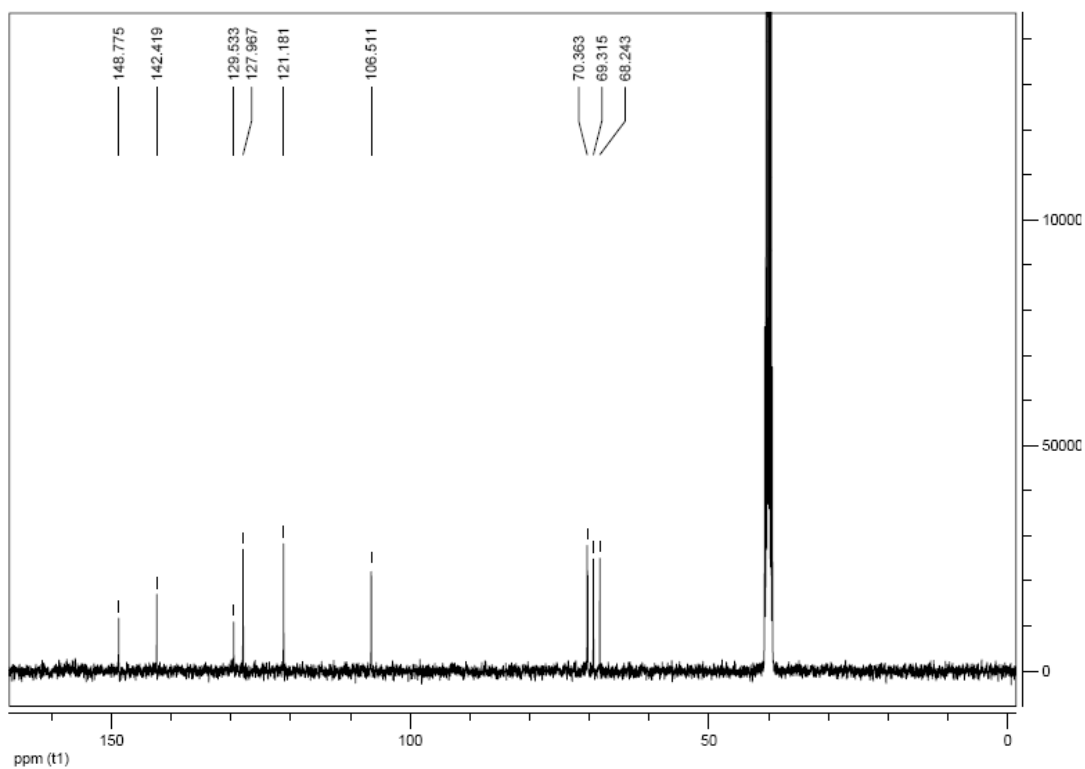

**Figure S8.**  $^{13}\text{C}$  NMR (75.4 MHz) of compound **5c** in  $d_6$ -DMSO.

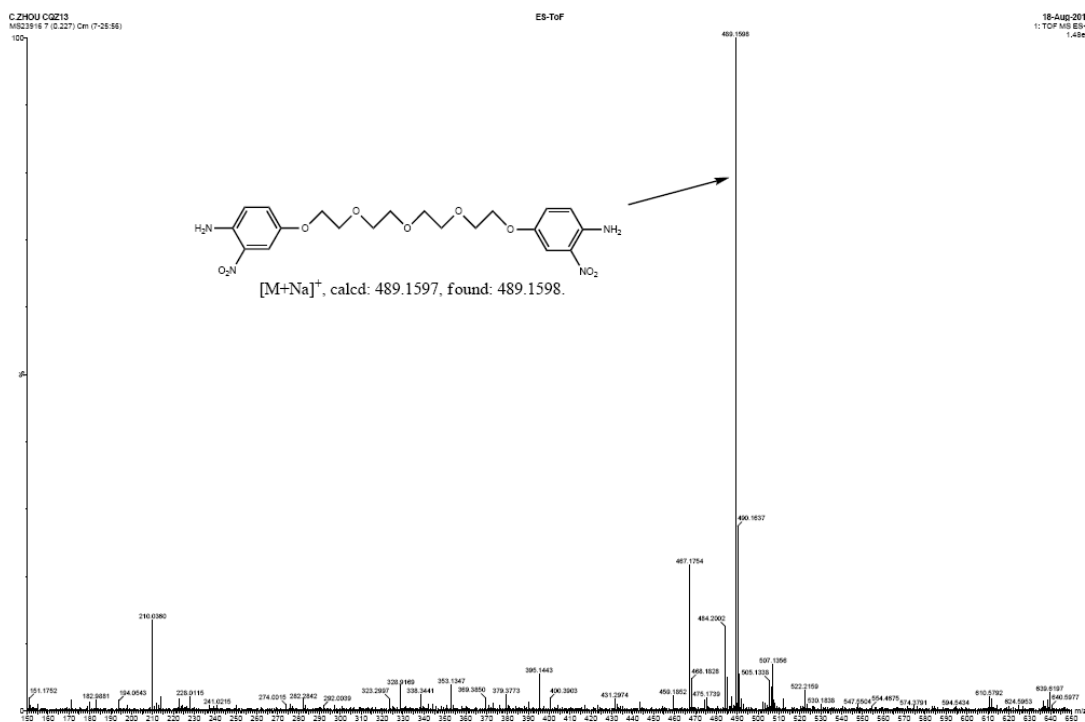

**Figure S9.** HR-ESI-MS of compound **5c**.

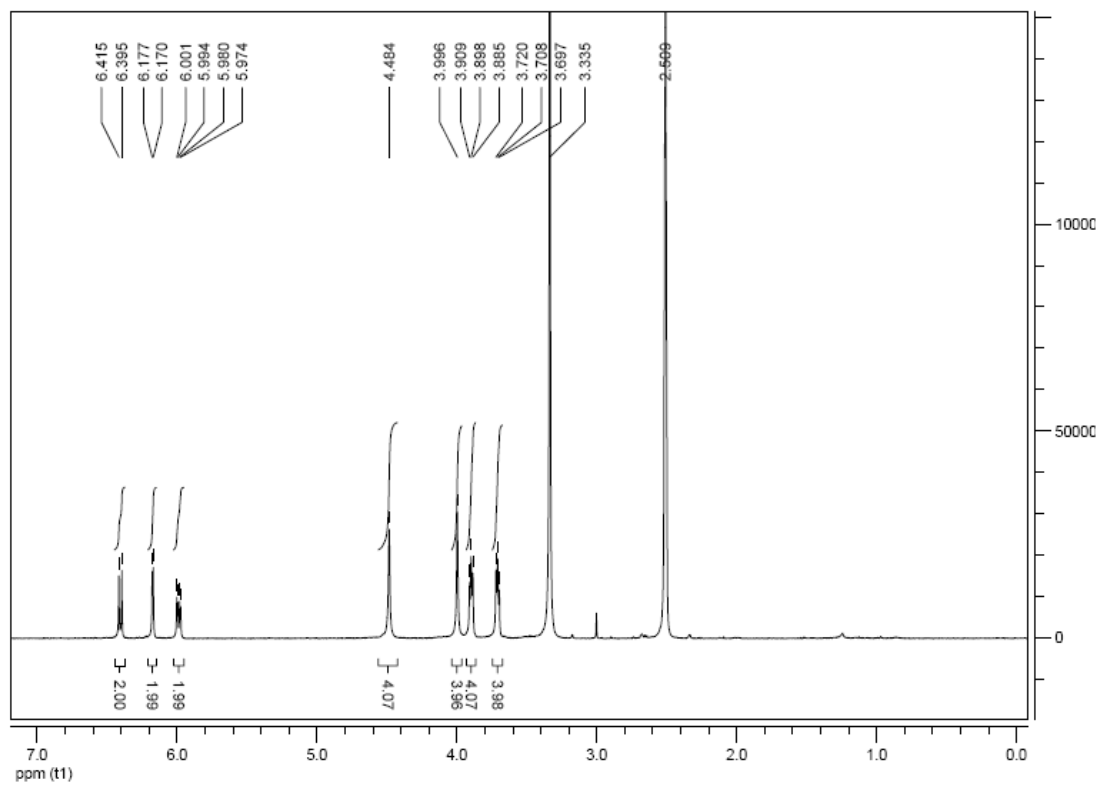

**Figure S10.** <sup>1</sup>H NMR (400 MHz) of compound **6a** in d<sub>6</sub>-DMSO.

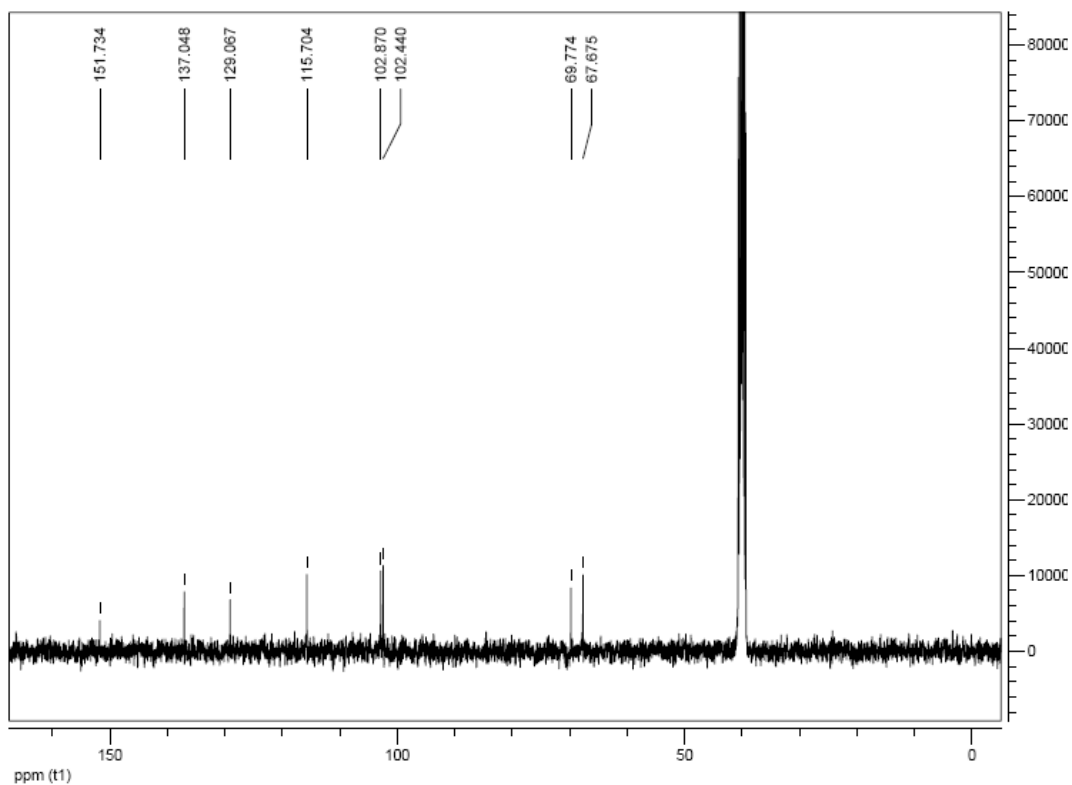

**Figure S11.**  $^{13}\text{C}$  NMR (75.4 MHz) of compound **6a** in  $d_6$ -DMSO.

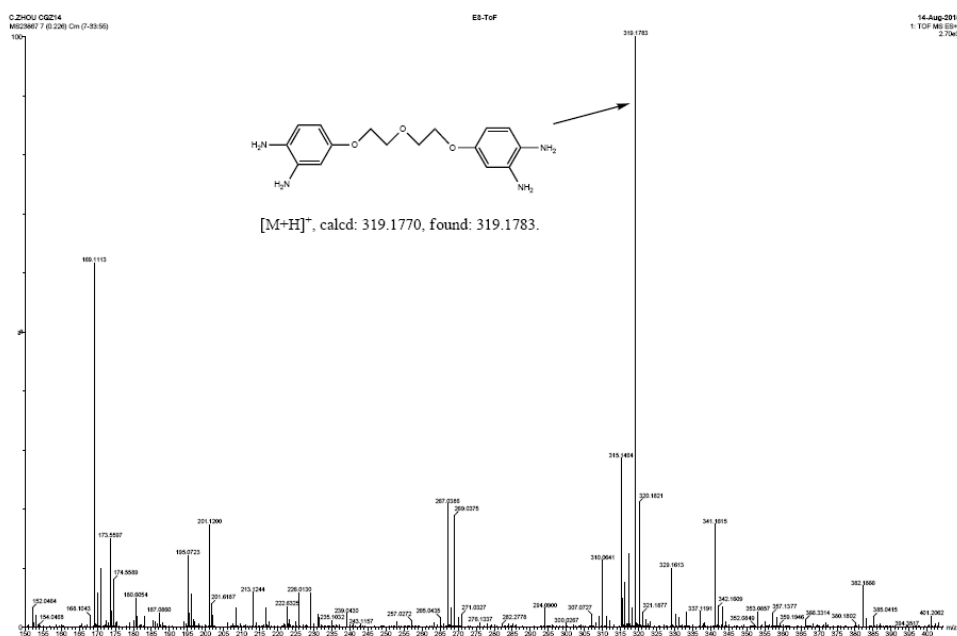

**Figure S12.** HR-ESI-MS of compound **6a**.

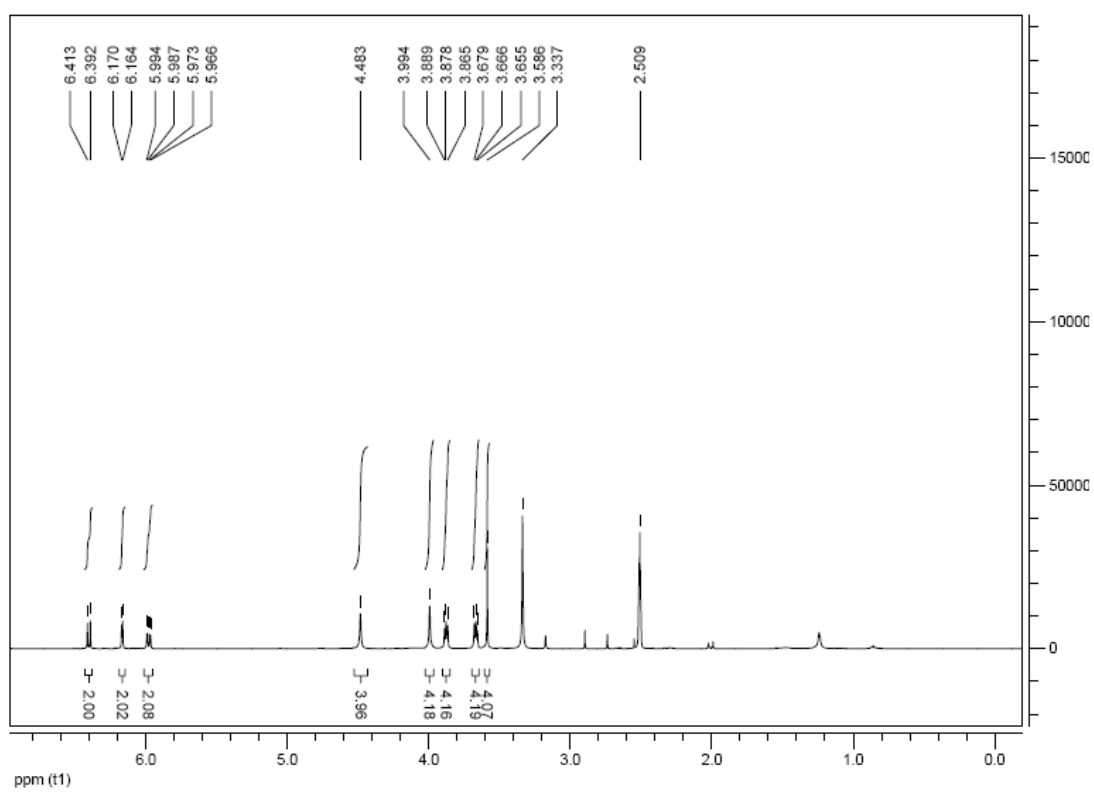

**Figure S13.**  $^1\text{H}$  NMR (400 MHz) of compound **6b** in  $d_6$ -DMSO.

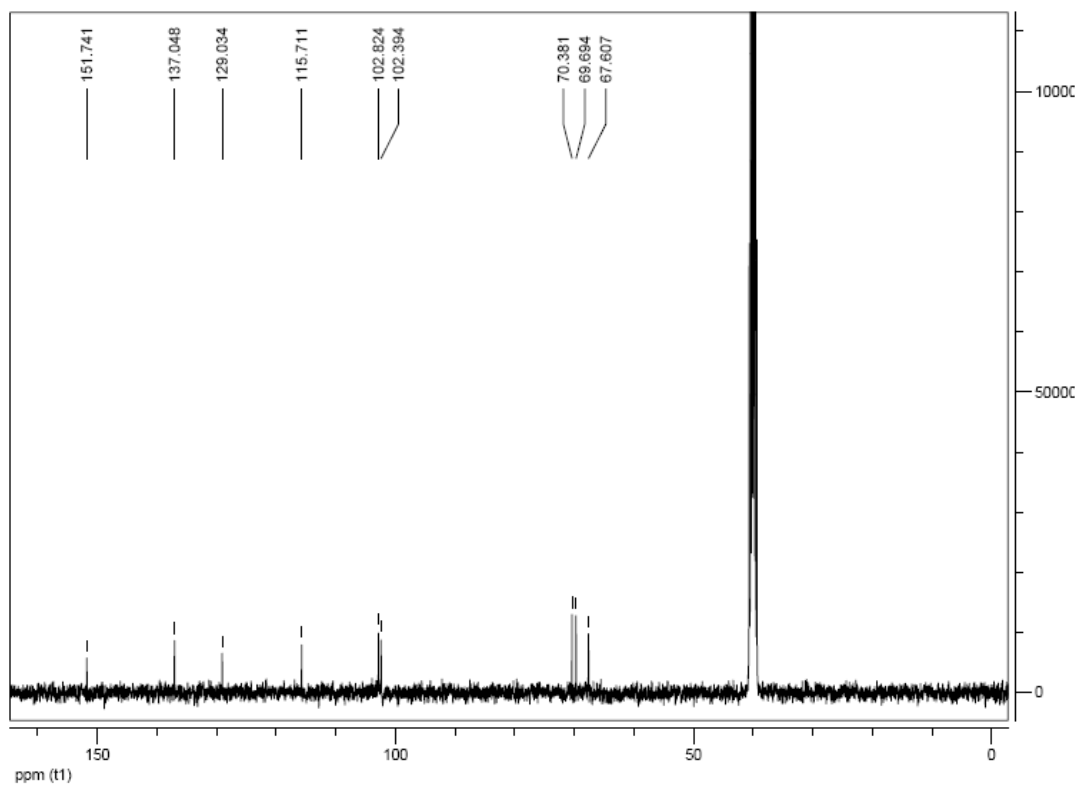

**Figure S14.**  $^{13}\text{C}$  NMR (75.4 MHz) of compound **6b** in  $d_6$ -DMSO.

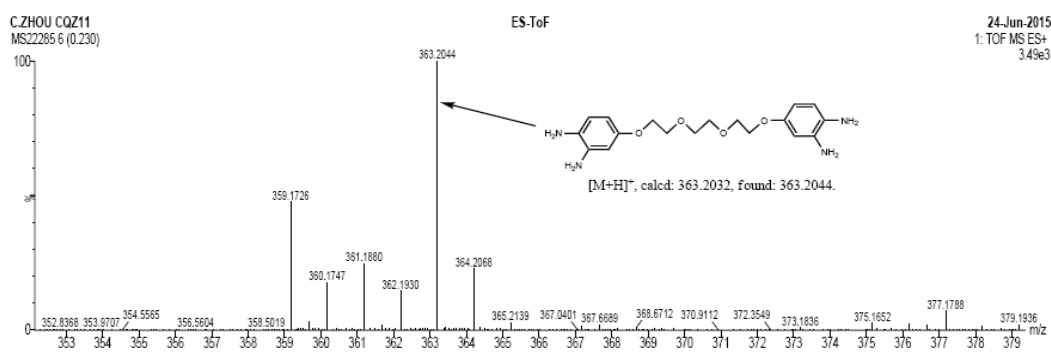

**Figure S15.** HR-ESI-MS of compound **6b**.

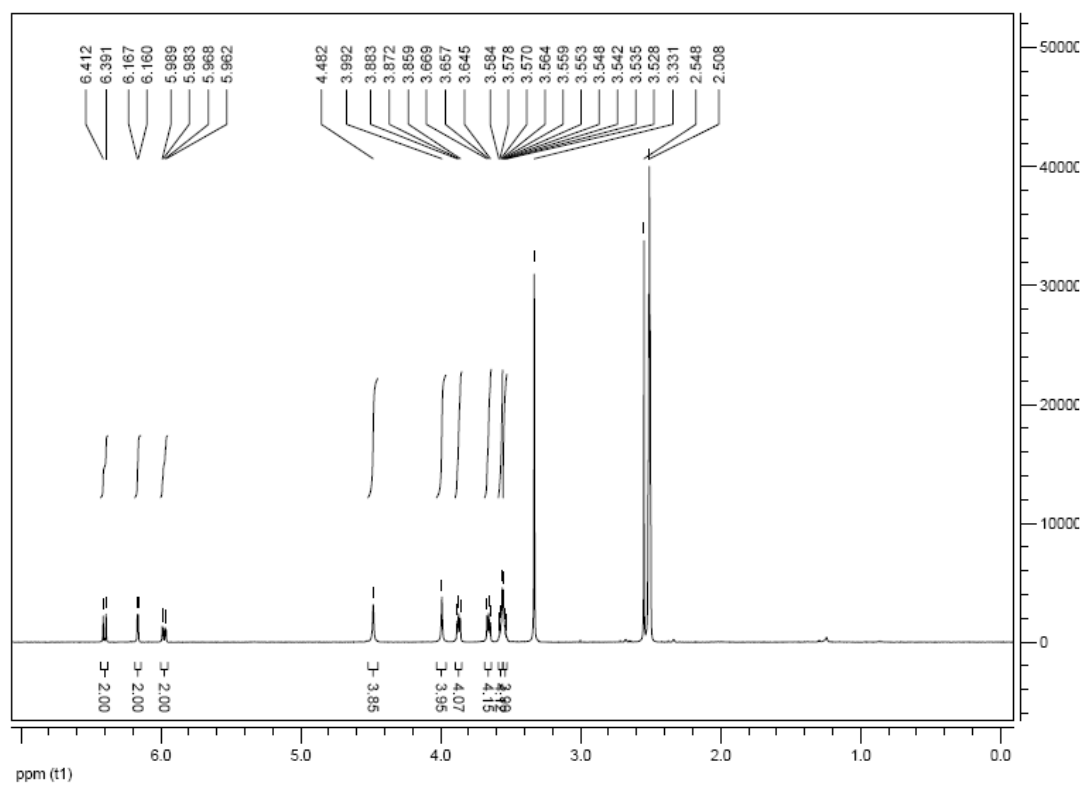

**Figure S16.**  $^1\text{H}$  NMR (400 MHz) of compound **6c** in  $d_6$ -DMSO.

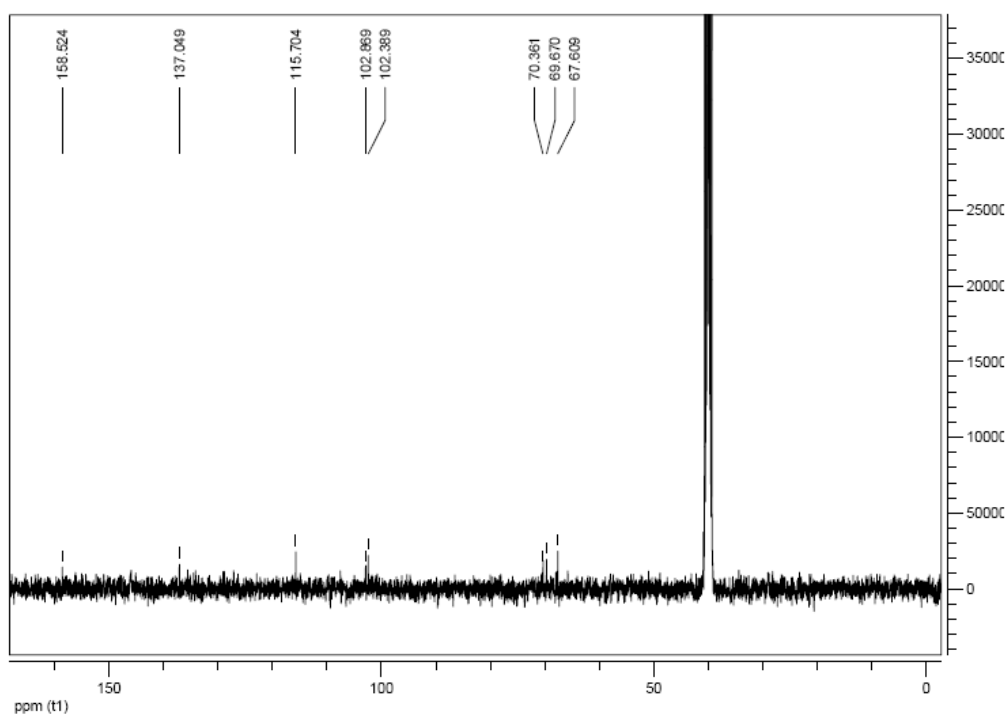

**Figure S17.**  $^{13}\text{C}$  NMR (75.4 MHz) of compound **6c** in  $d_6$ -DMSO.

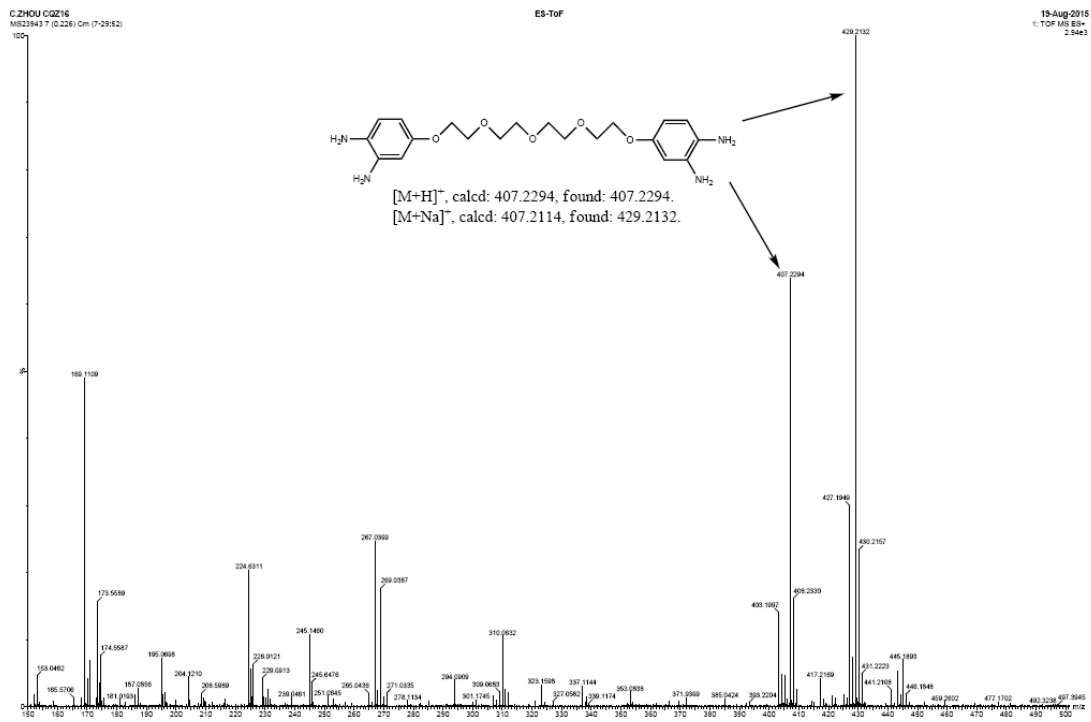

**Figure S18.** HR-ESI-MS of compound **6c**.

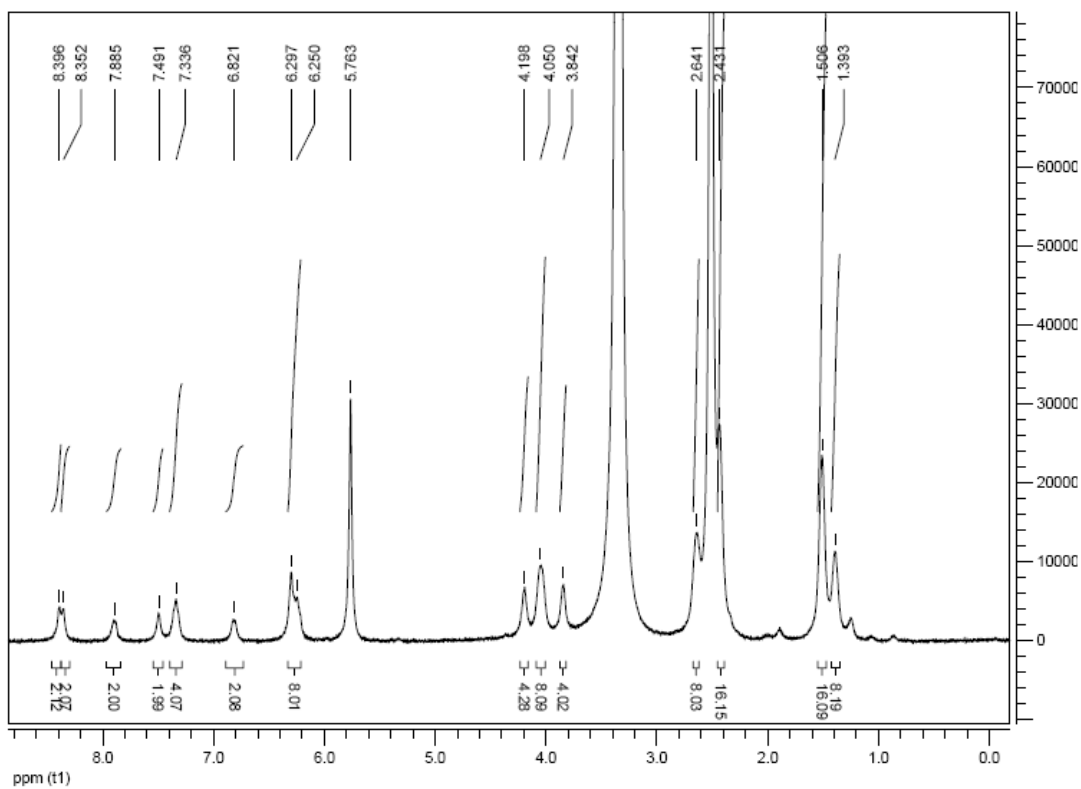

**Figure S19.**  $^1\text{H}$  NMR (400 MHz) of complex **2a** in  $d_6$ -DMSO.

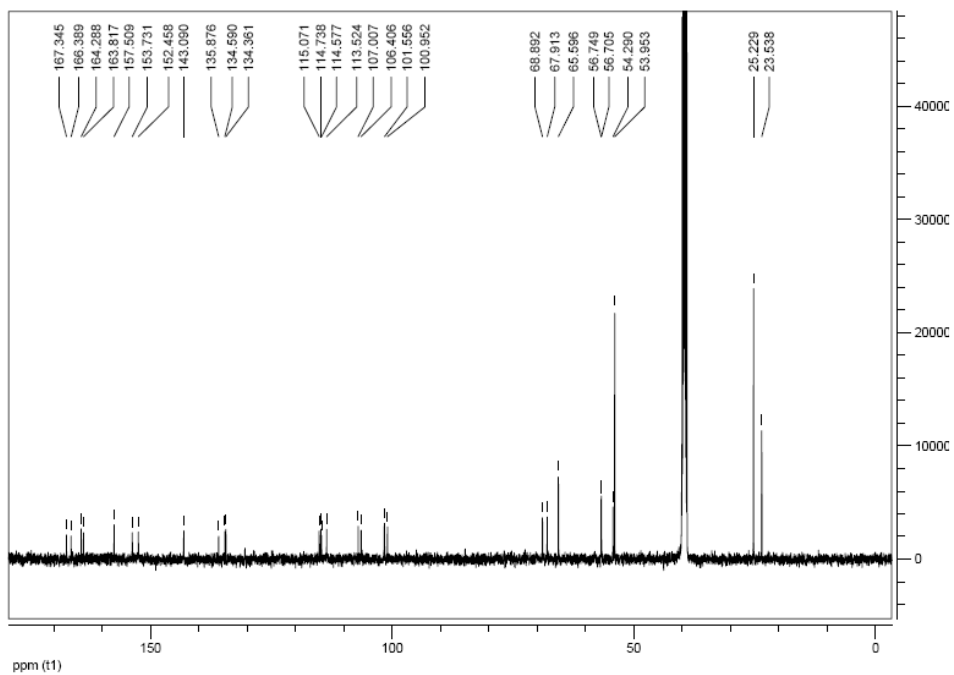

**Figure S20.**  $^{13}\text{C}$  NMR (75.4 MHz) of complex **2a** in  $d_6$ -DMSO.



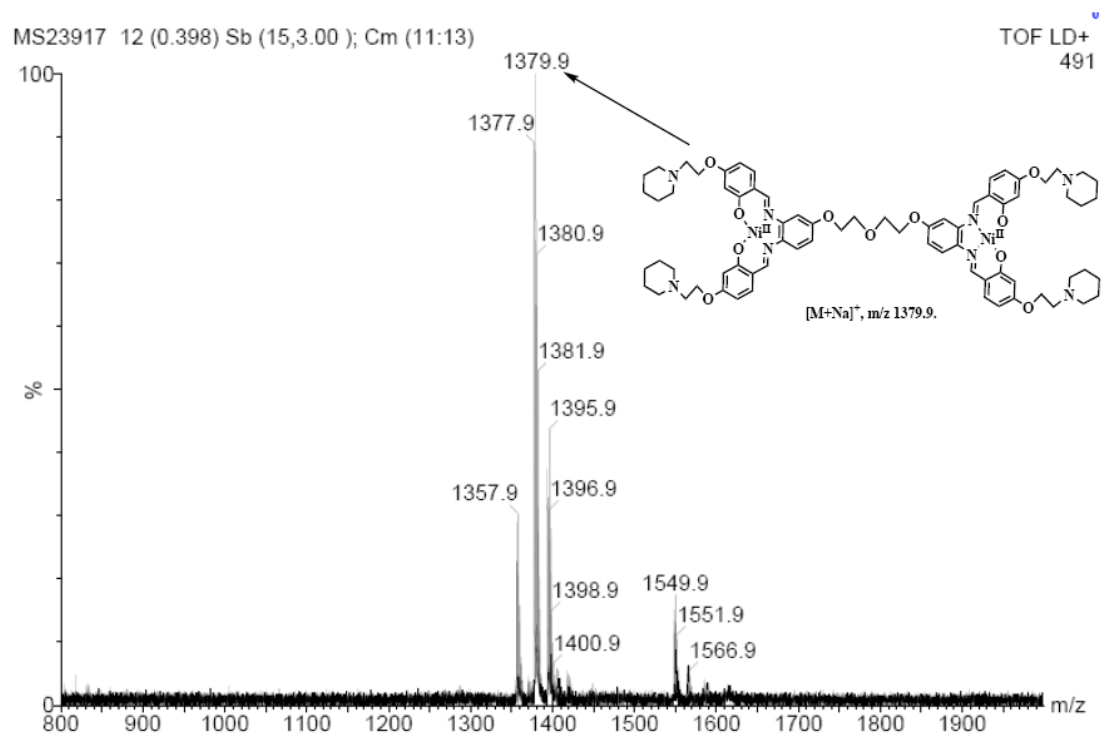

**Figure S21.** MALDI-TOF MS of complex **2a**.

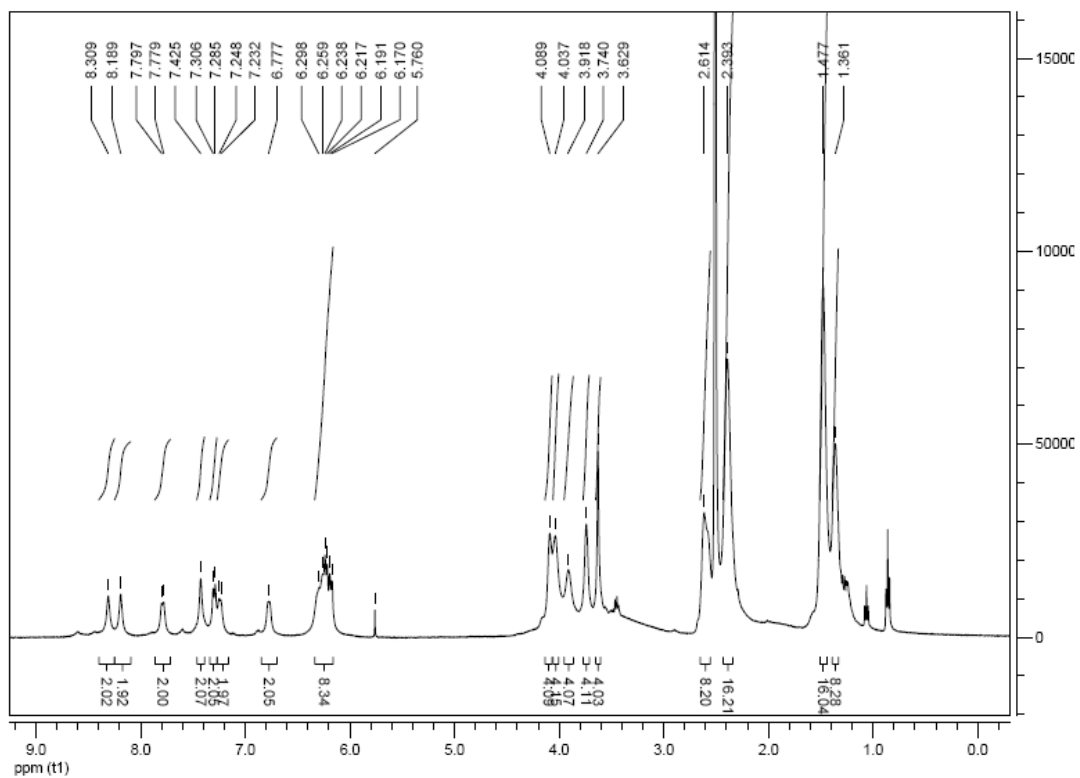

**Figure S22.**  $^1\text{H}$  NMR (400 MHz) of complex **2b** in  $d_6$ -DMSO.

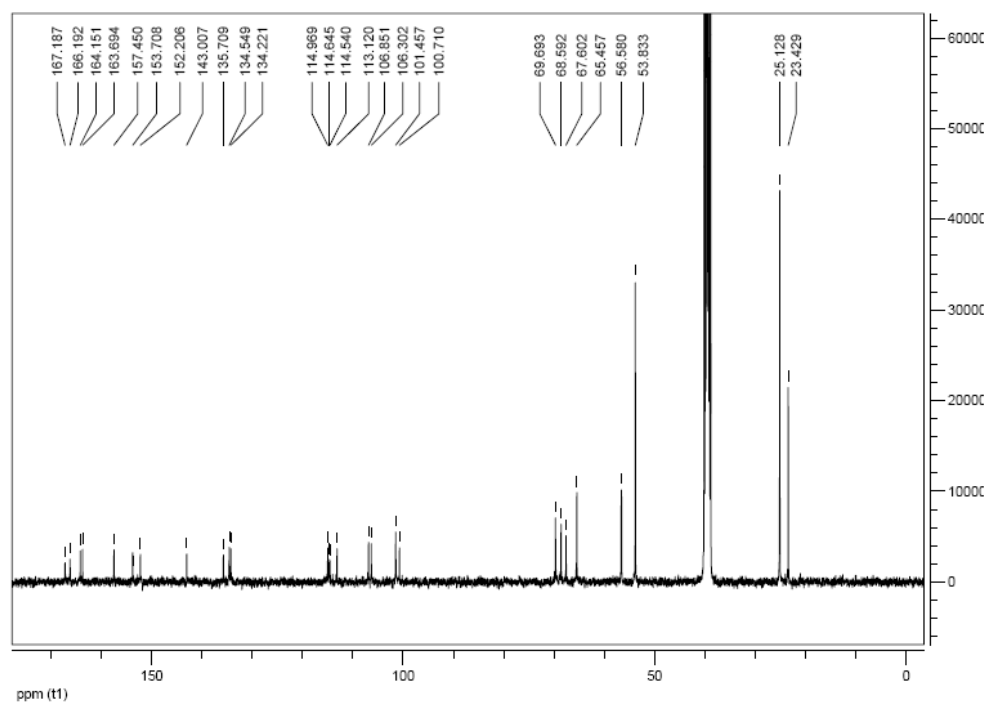

**Figure S23.**  $^{13}\text{C}$  NMR (75.4 MHz) of complex **2b** in  $d_6$ -DMSO.

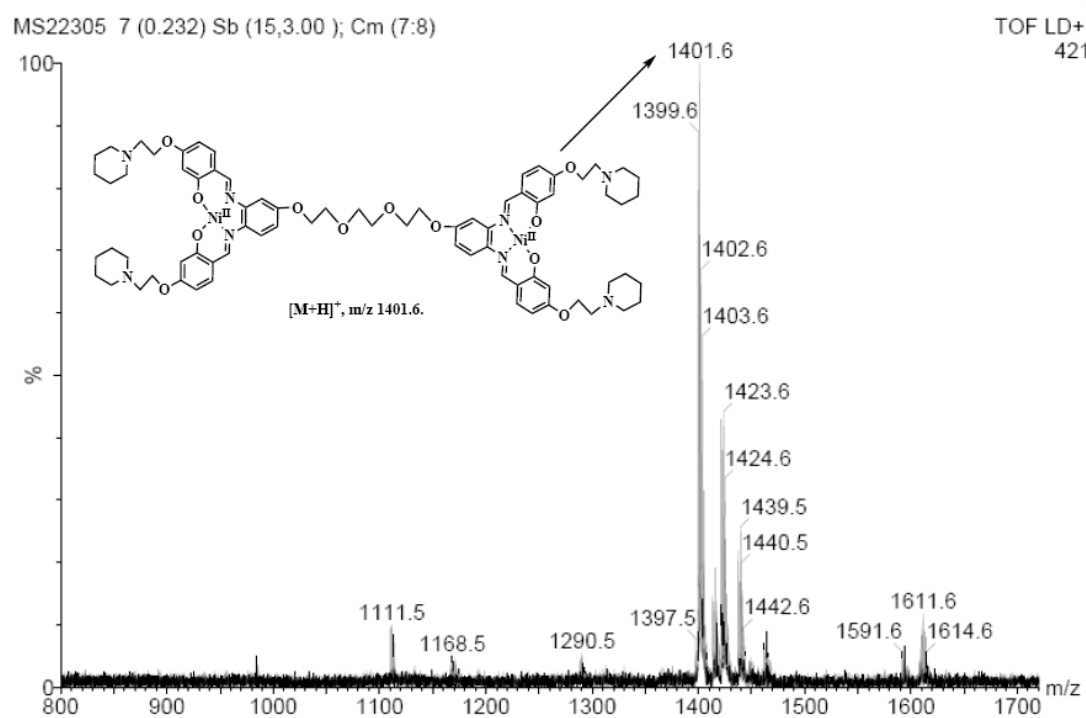

**Figure S24.** MALDI-TOF MS of complex **2b**.

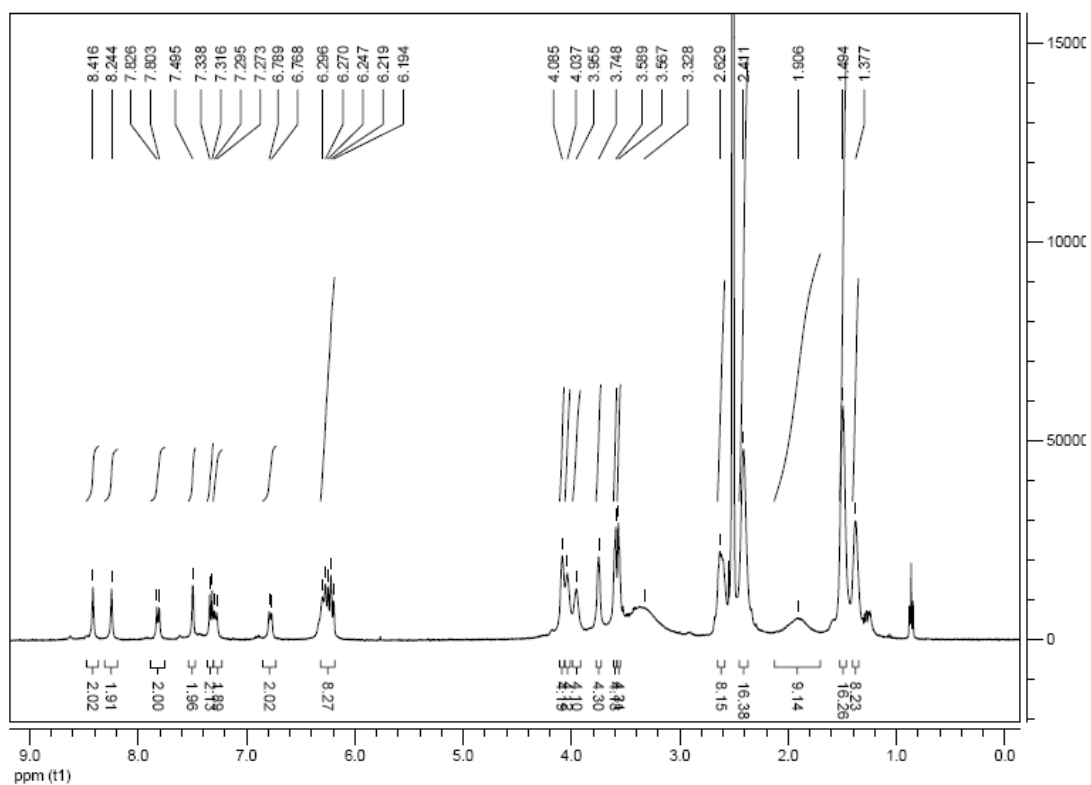

**Figure S25.**  $^1\text{H}$  NMR (400 MHz) of complex **2c** in  $d_6$ -DMSO.

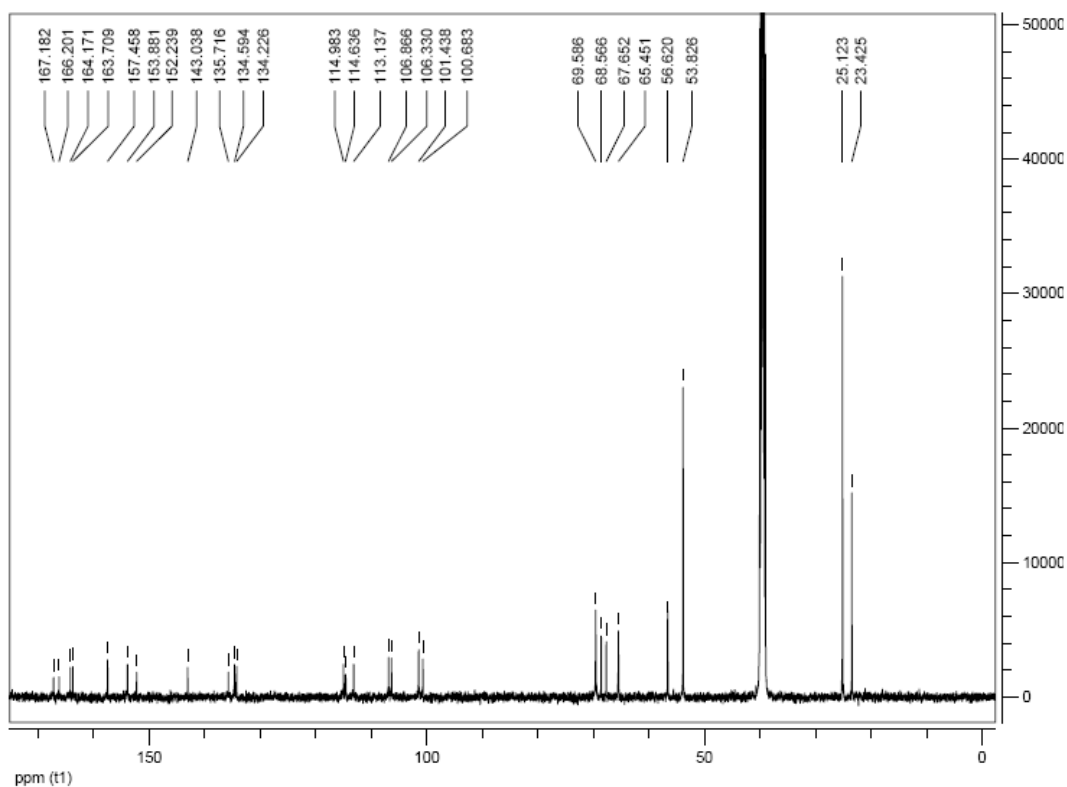

**Figure S26.**  $^{13}\text{C}$  NMR (75.4 MHz) of complex **2c** in  $d_6$ -DMSO.

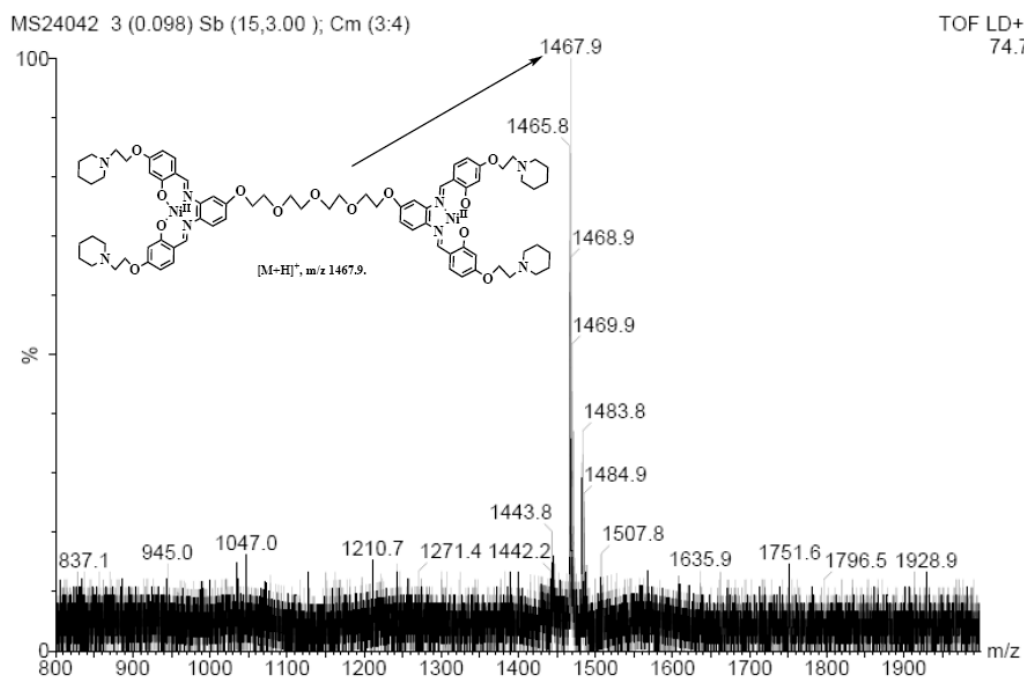

**Figure S27.** MALDI-TOF MS of complex **2c**.

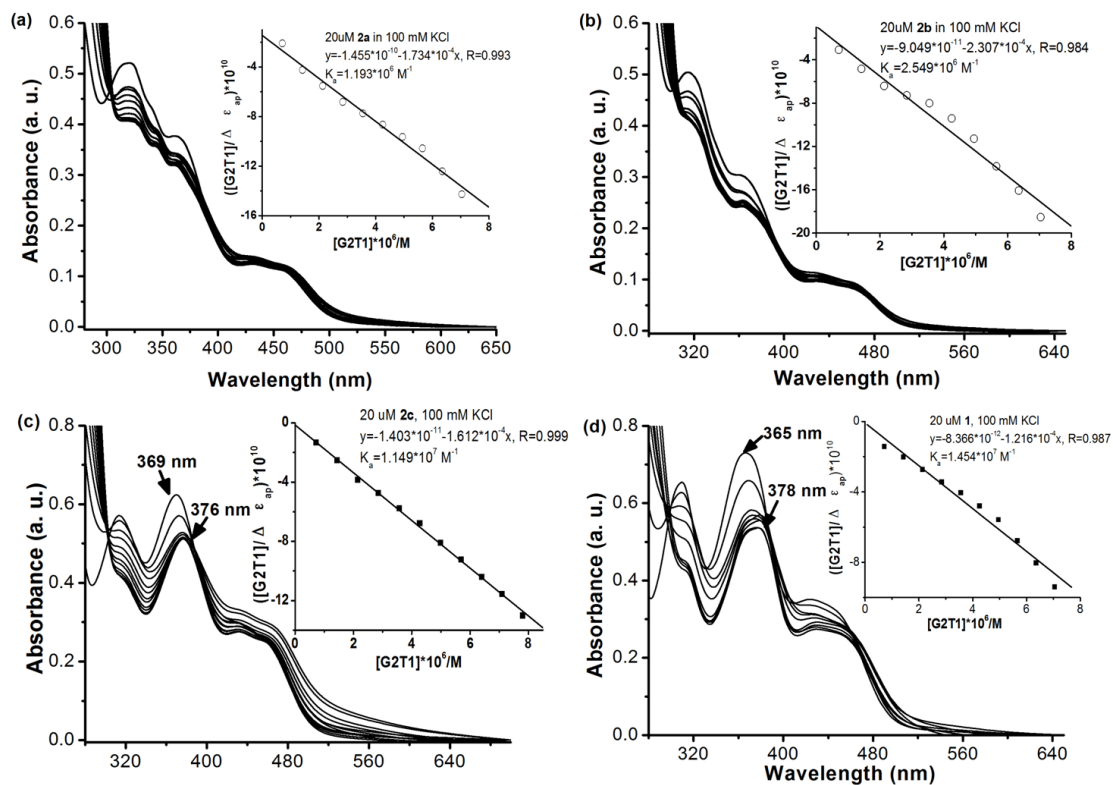

**Figure S28.** UV-Vis absorption spectra of nickel complexes **2a** (a), **2b** (b), **2c** (c) and **1** (d) ([complex]=20  $\mu$ M) with increasing the concentration (from 0~10  $\mu$ M in 10 mM Tris-HCl and 100 mM KCl, pH 7.04) of G2T1 DNA. Inset: a reciprocal plot of  $([G2T1]/\Delta\epsilon_{ap}) \times 10^{10}$  versus  $[G2T1] \times 10^6$ ,  $\Delta\epsilon_{ap}=(A_{observed}-A_{free\ complex})/[complex]$ .

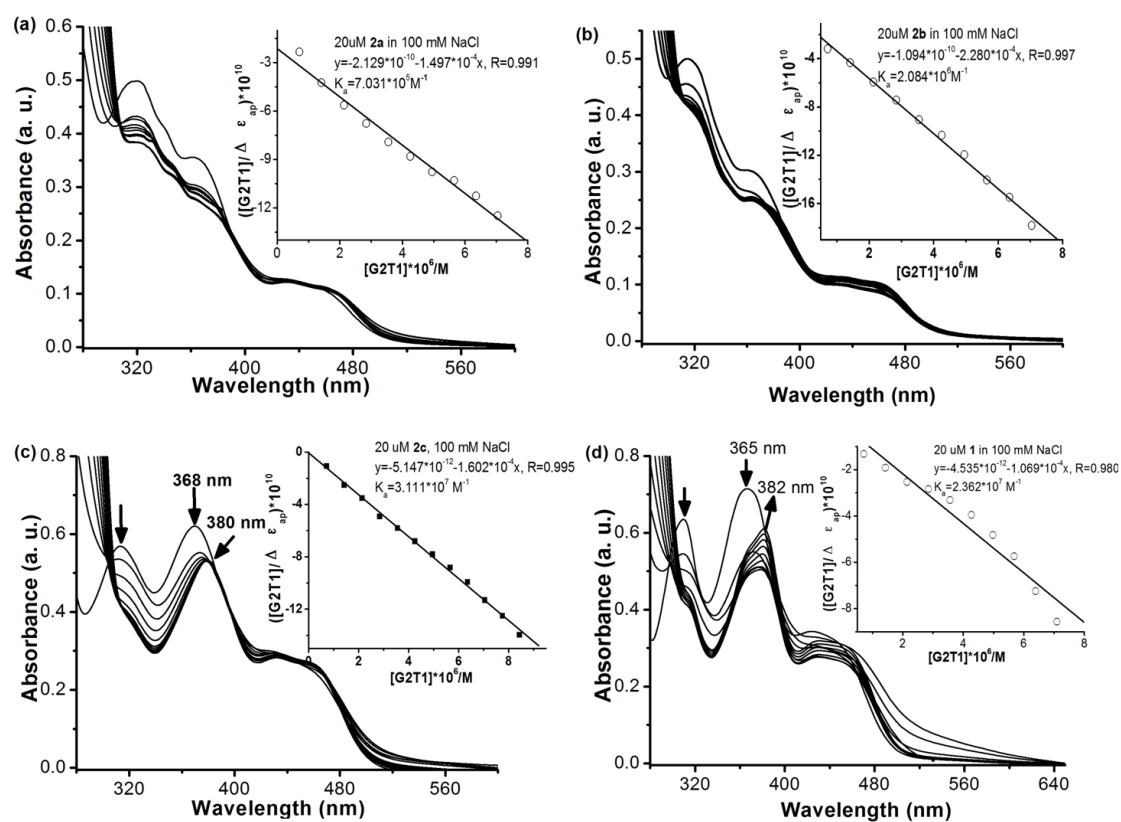

**Figure S29.** UV-Vis absorption spectra of nickel complexes **2a** (a), **2b** (b), **2c** (c) and **1** (d) ( $[\text{complex}] = 20 \mu\text{M}$ ) with increasing the concentration (from 0~10  $\mu\text{M}$  in 10 mM Tris-HCl and 100 mM NaCl, pH 7.04) of G2T1 DNA. Inset: Inset: a reciprocal plot of  $([\text{G2T1}]/\Delta\epsilon_{\text{ap}}) \times 10^{10}$  versus  $[\text{G2T1}] \times 10^6$ ,  $\Delta\epsilon_{\text{ap}} = (A_{\text{observed}} - A_{\text{free complex}})/[\text{complex}]$ .

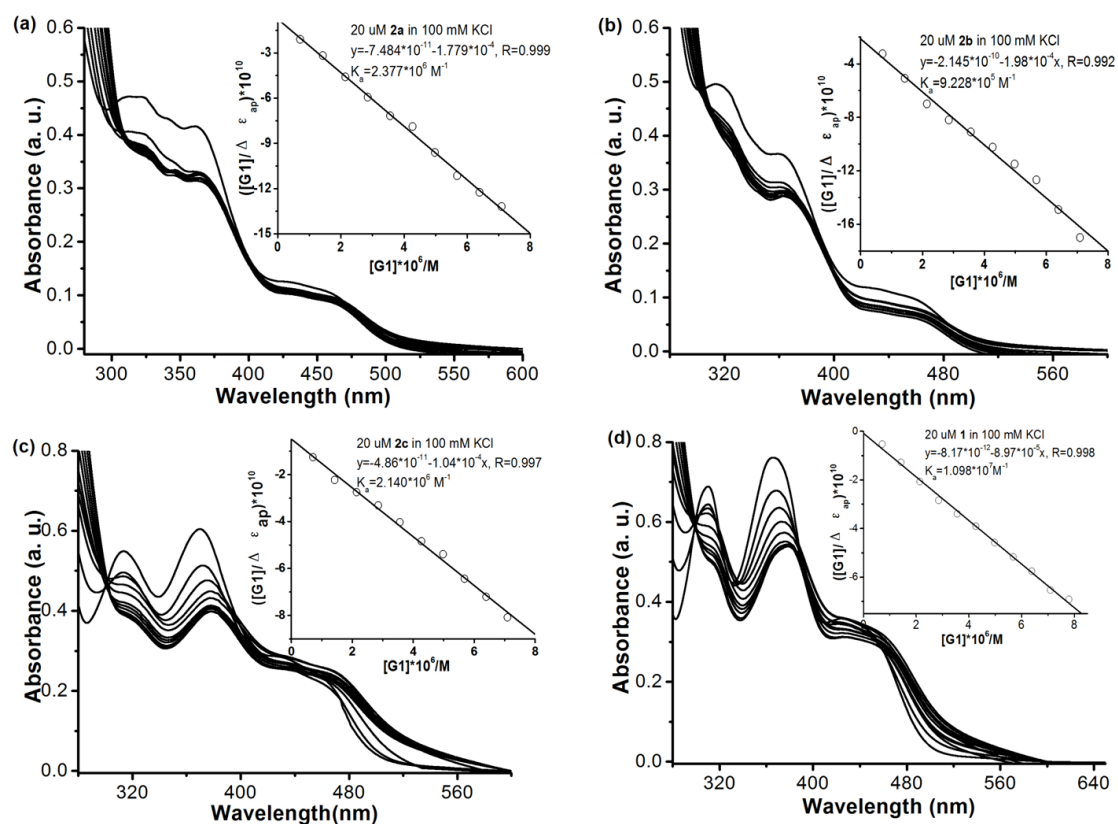

**Figure S30.** UV-Vis absorption spectra of nickel complexes **2a** (a), **2b** (b), **2c** (c) and **1** (d) ( $[\text{complex}] = 20 \mu\text{M}$ ) with increasing the concentration (from 0~10  $\mu\text{M}$  in 10 mM Tris-HCl and 100 mM KCl, pH 7.04) of G1 DNA. Inset: a reciprocal plot of  $([G1]/\Delta \epsilon_{ap}) \times 10^{10}$  versus  $[G1] \times 10^6$ ,  $\Delta \epsilon_{ap} = (A_{\text{observed}} - A_{\text{free complex}}) / [\text{complex}]$ .



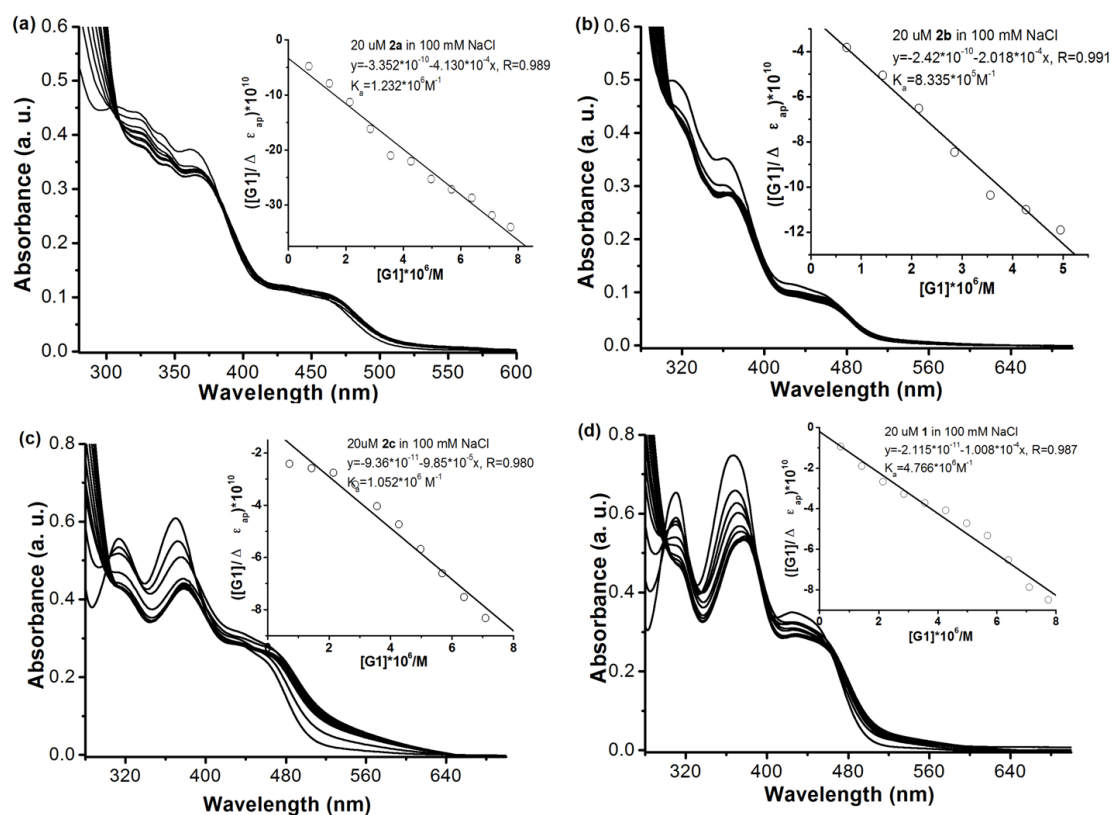

**Figure S31.** UV-Vis absorption spectra of nickel complexes **2a** (a), **2b** (b), **2c** (c) and **1** (d) ( $[\text{complex}] = 20 \mu\text{M}$ ) with increasing the concentration (from 0~10  $\mu\text{M}$  in 10 mM Tris-HCl and 100 mM NaCl, pH 7.04) of G1 DNA. Inset: a reciprocal plot of  $([\text{G1}]/\Delta\epsilon_{\text{ap}}) \times 10^{10}$  versus  $[\text{G1}] \times 10^6$ ,  $\Delta\epsilon_{\text{ap}} = (A_{\text{observed}} - A_{\text{free complex}}) / [\text{complex}]$ .

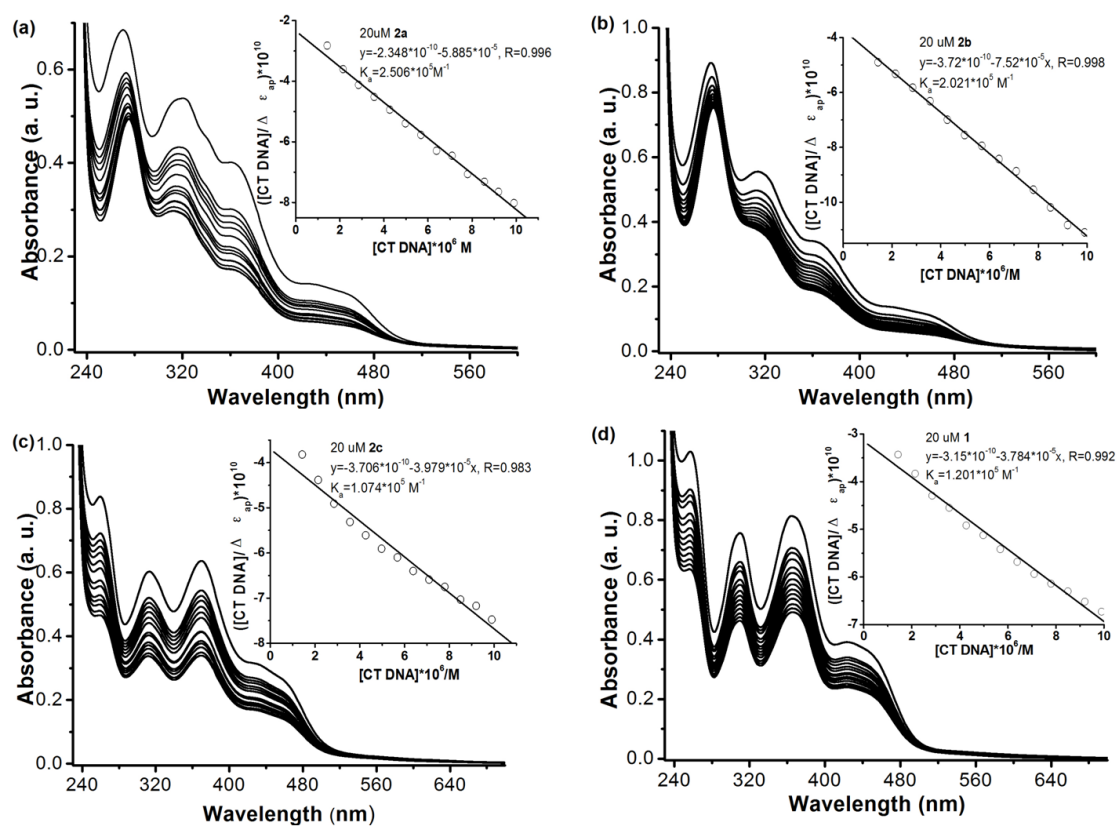

**Figure S32.** UV-Vis absorption spectra of nickel complexes **2a** (a), **2b** (b), **2c** (c) and **1** (d) ( $[\text{complex}] = 20 \mu\text{M}$ ) with increasing the concentration (from 0~10  $\mu\text{M}$  in 10 mM Tris-HCl and 100 mM NaCl, pH 7.04) of CT DNA. Inset: a reciprocal plot of  $([\text{CT DNA}]/\Delta\epsilon_{\text{ap}}) \times 10^{10}$  versus  $[\text{CT DNA}] \times 10^6$ ,  $\Delta\epsilon_{\text{ap}} = (A_{\text{observed}} - A_{\text{free complex}})/[\text{complex}]$ .

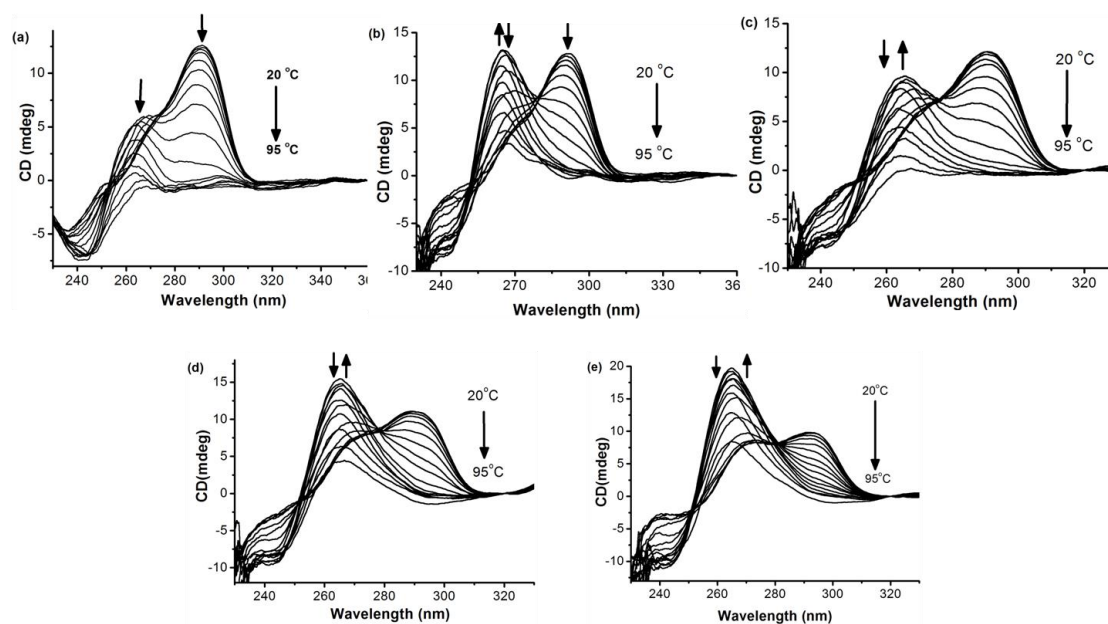

**Figure S33.** CD spectra of quadruplex dimer (G2T1, 2.5  $\mu\text{M}$ ) from 20  $^{\circ}\text{C}$  to 95  $^{\circ}\text{C}$  without (a) and with complexes **2a** (5  $\mu\text{M}$ , b), **2b** (5  $\mu\text{M}$ , c), **2c** (5  $\mu\text{M}$ , d) and **1** (10  $\mu\text{M}$ , e) in the buffer of 10 mM Tris-HCl and 100 mM KCl (pH 7.04).

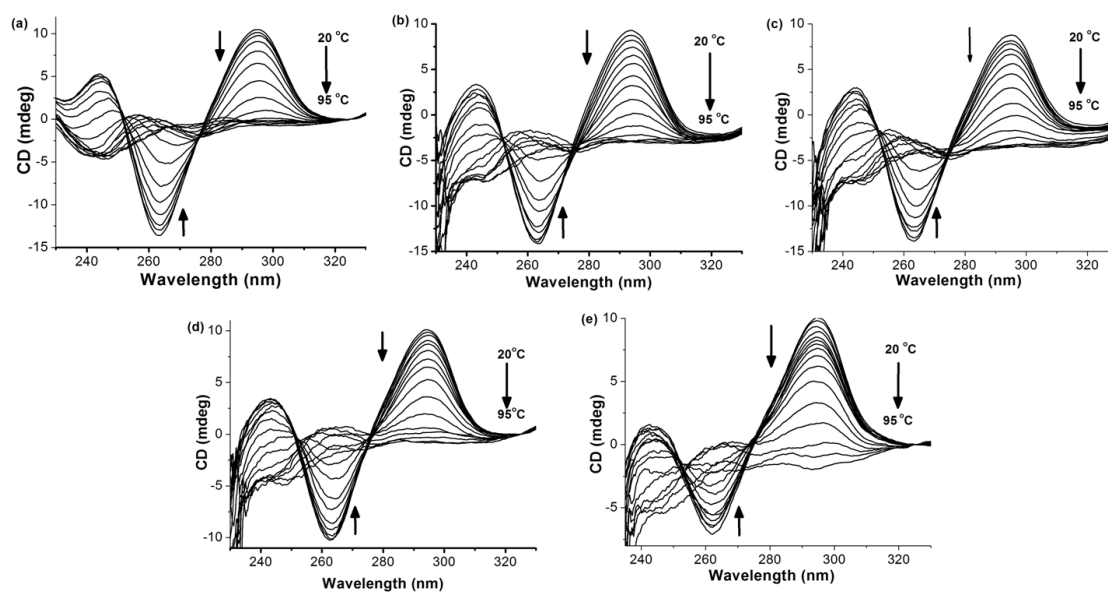

**Figure S34.** CD spectra of quadruplex dimer (G2T1, 2.5  $\mu\text{M}$ ) from 20  $^{\circ}\text{C}$  to 95  $^{\circ}\text{C}$  without (a) and with complexes **2a** (5  $\mu\text{M}$ , b), **2b** (5  $\mu\text{M}$ , c), **2c** (5  $\mu\text{M}$ , d), and **1** (10  $\mu\text{M}$ , e) in the buffer of 10 mM Tris-HCl and 100 mM NaCl (pH 7.04).

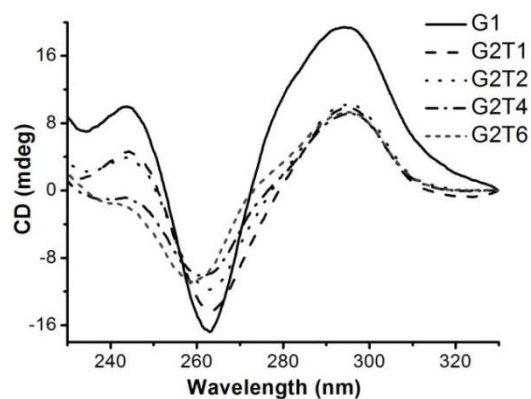

**Figure S35.** CD spectra of G1 (5  $\mu\text{M}$ ), G2T1 (2.5  $\mu\text{M}$ ), G2T2 (2.5  $\mu\text{M}$ ), G2T4 (2.5  $\mu\text{M}$ ) and G2T6 (2.5  $\mu\text{M}$ ) in 10 mM Tris-HCl buffer (100 mM NaCl, pH 7.04).

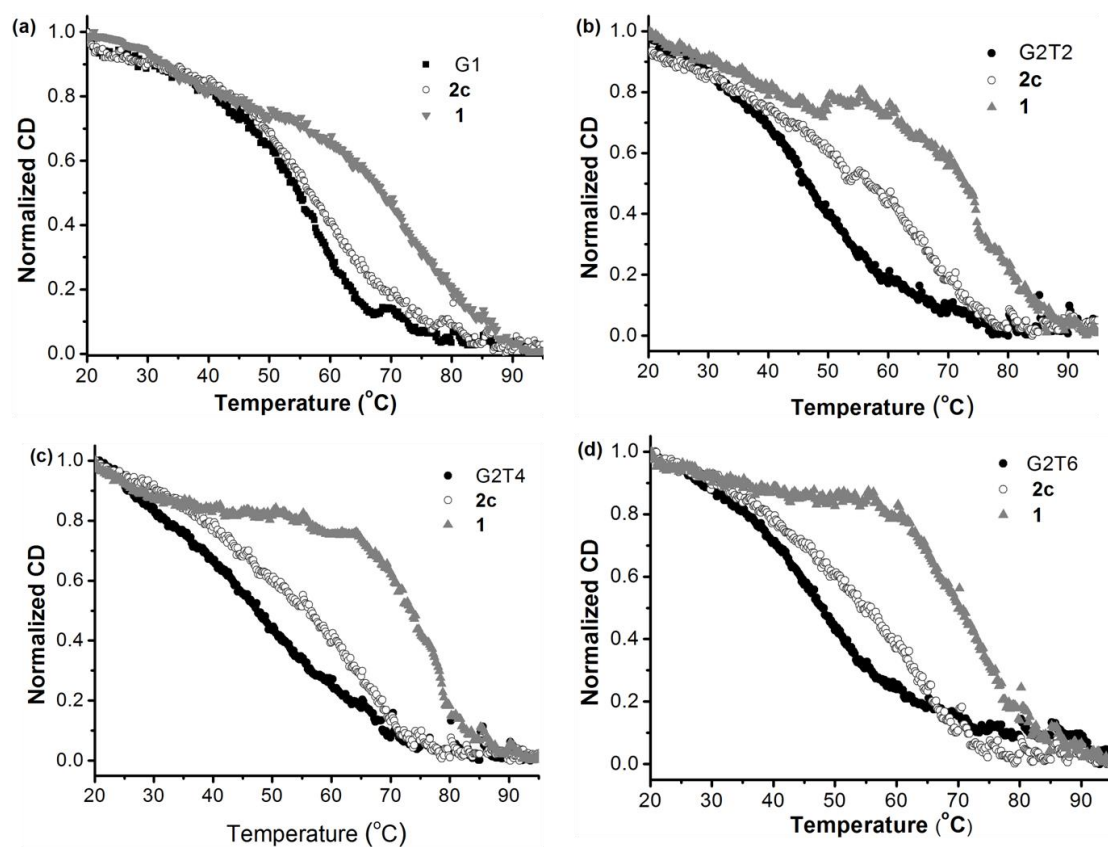

**Figure S36.** CD melting profiles at 295 nm for monomeric quadruplex G1 (a, 5.0  $\mu\text{M}$ ), and a series of dimeric quadruplexes G2T2 (b, 2.5  $\mu\text{M}$ ), G2T4 (c, 2.5  $\mu\text{M}$ ) and G2T6 (d, 2.5  $\mu\text{M}$ ), respectively, when bound to di-nickel complex **2c** (5.0  $\mu\text{M}$ ) and mono nickel complex **1** (10.0  $\mu\text{M}$ ) in 10 mM Tris-HCl and 100 mM NaCl (pH 7.04).

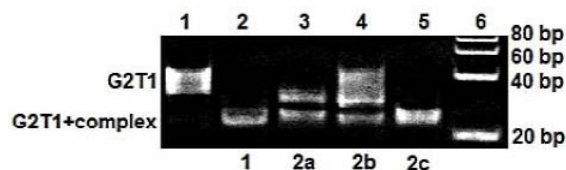

**Figure S37.** GE analysis of G2T1 in 10 mM Tris-HCl and 100 mM NaCl (pH 7.04) in the presence of four nickel complexes: lane 1, G2T1 (8  $\mu$ M); lane 2~5, G2T1 (8  $\mu$ M) with complex **1** (32  $\mu$ M), **2a** (16  $\mu$ M), **2b** (16  $\mu$ M) and **2c** (16  $\mu$ M), respectively; lane 6, DNA ladder.

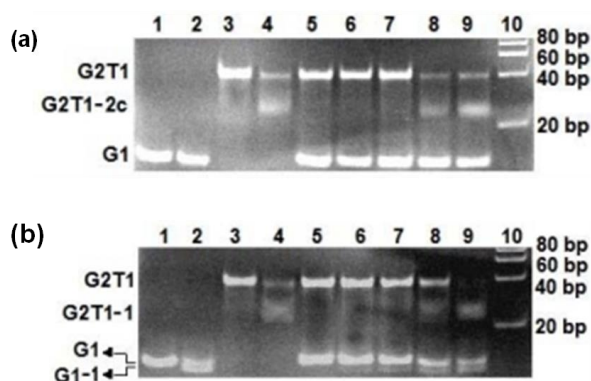

**Figure S38.** (a) GE analysis of G2T1 in 10 mM Tris-HCl and 100 mM KCl (pH 7.04) in the presence of **2c**. Lanes 1~2: G1 (16  $\mu$ M) in the absence and presence of complex **2c** (16  $\mu$ M); lanes 3~4: G2T1 (8  $\mu$ M) in the absence and presence of complex **2c** (16  $\mu$ M); lane 5: a mixture of G1 (16  $\mu$ M) and G2T1 (8  $\mu$ M); lanes 6~9: mixtures of G1 (16  $\mu$ M) and G2T1 (8  $\mu$ M) in the presence of 4, 8, 16 and 32  $\mu$ M of complex **2c**, respectively; lane 10: DNA ladder. (b) GE analysis of G1, G2T1 and their mixture in 10 mM Tris-HCl and 100 mM KCl (pH 7.04) in the presence of complex **1**. Lanes 1~2: G1 (16  $\mu$ M) in the absence and presence of complex **1** (32  $\mu$ M); lanes 3~4: G2T1 (8  $\mu$ M) in the absence and presence of complex **1** (32  $\mu$ M); lane 5: a mixture of G1 (16  $\mu$ M) and G2T1 (8  $\mu$ M); lanes 6~9: mixtures of G1 (16  $\mu$ M) and G2T1 (8  $\mu$ M) in the presence of 8, 16, 32 and 64  $\mu$ M of complex **1**, respectively; lane 10: DNA ladder.
